# Supplementary material
Source: PubMed Central journal article supplement (PMC4123932)
Supplement: es501100w_si_001.pdf [file es501100w_si_001.pdf]

Supplementary Information

## **Human Fetal Exposure to Triclocarban and Triclosan in an Urban Population from Brooklyn, NY**

Benny F.G. Pycke, Laura A. Geer<sup>2</sup>, Mudar Dalloul<sup>3</sup>, Ovadia Abulafia<sup>3</sup>, Alizee Jenck<sup>1</sup>, and Rolf U. Halden<sup>1,\*</sup>

<sup>1</sup> Center for Environmental Security, The Biodesign Institute, Arizona State University, 781 E. Terrace Rd., Tempe, AZ 85287 USA, USA

<sup>2</sup> Department of Environmental and Occupational Health Sciences, State University of New York, Downstate School of Public Health, BOX 43, 450 Clarkson Ave., Brooklyn, NY, USA

<sup>3</sup> Department of Obstetrics and Gynecology, State University of New York Downstate Medical Center, 445 Lenox Road, Brooklyn, NY, USA

**Journal:** *Environmental Science & Technology*

**Pages:** 9

**Tables:** 4

\* Correspondence: Email : [halden@asu.edu](mailto:halden@asu.edu)

Tel : (480) 727-0893

Mail : 781 E Terrace Rd; Tempe, AZ 85287

**Table S1.** Descriptive statistics of the study population ( $n = 190$ ). Adapted from Geer et al., 2012.<sup>49</sup>

| Maternal characteristics               | N (Percentage) |
|----------------------------------------|----------------|
| <b>Country of birth</b>                |                |
| U.S.                                   | 92 (48.4)      |
| Outside of U.S.                        | 98 (51.6)      |
|                                        |                |
| <b>Race/ethnic origin</b>              |                |
| African American                       | 81 (42.6)      |
| Caribbean or West Indian               | 78 (41.1)      |
| African, from the African continent    | 12 (6.3)       |
| Latino/Hispanic                        | 15 (7.9)       |
| Other                                  | 4 (2.1)        |
|                                        |                |
| <b>Age (years)</b>                     |                |
| 24                                     | 69 (36.3)      |
| 25-29                                  | 50 (26.3)      |
| 30-34                                  | 44 (23.2)      |
| 35                                     | 27 (14.2)      |
|                                        |                |
| <b>Years education</b>                 |                |
| Some high school or less               | 48 (25.3)      |
| High school degree                     | 59 (31.0)      |
| Technical school, some college or more | 83 (43.7)      |

**Table S2.** Overview of the values for compound-specific LC and MS/MS parameters.

| <b>Analyte</b>                                              | <b>Transition<br/>(Confirmation Ion)</b>     | <b>DP<br/>(V)</b> | <b>CE<br/>(V)</b> | <b>CXP<br/>(V)</b> | <b>RT<br/>(min)</b> | <b>Dwell Time<br/>(ms)</b> |
|-------------------------------------------------------------|----------------------------------------------|-------------------|-------------------|--------------------|---------------------|----------------------------|
| <b>Triclosan</b>                                            | 289>35 ( <sup>13</sup> C <sub>12</sub> TCS)  | -60               | -34               | -3                 | 8.07                | 50                         |
| <sup>13</sup> C <sub>12</sub> <b>Triclosan</b>              | 301>35 (NA)                                  | -60               | -34               | -3                 | 8.07                | 50                         |
| <b>Triclocarban</b>                                         | 313>160 ( <sup>13</sup> C <sub>13</sub> TCC) | -80               | -18               | -9                 | 7.86                | 50                         |
| <sup>13</sup> C <sub>13</sub> <b>Triclocarban</b>           | 326>166 (NA)                                 | -80               | -18               | -9                 | 7.86                | 50                         |
| <b>2'-OH-Triclocarban<sup>a</sup></b>                       | 329>168 (142)                                | -50 (-50)         | -22 (-30)         | -6 (-6)            | 7.75                | 50                         |
| <b>3'-OH-Triclocarban<sup>a</sup></b>                       | 329>168 (142)                                | -55 (-55)         | -15 (-30)         | -5 (-3)            | 7.15                | 50                         |
| <b>3'-Cl-Triclocarban</b>                                   | 349>160 (162)                                | -60 (-60)         | -30 (-25)         | -5 (-5)            | 8.28                | 50                         |
| <b>4-Methylumbelliferone</b>                                | 175>133 ( <sup>13</sup> C <sub>4</sub> MUF)  | -75               | -32               | -5                 | 4.92                | 50                         |
| <sup>13</sup> C <sub>4</sub> - <b>4-Methylumbelliferone</b> | 179>135 (NA)                                 | -80               | -30               | -5                 | 4.92                | 50                         |

CE: Collision energy; CXP: Collision cell exit potential; DP: Declustering potential; NA: Not applicable; RT: Retention time

<sup>a</sup> Presumed sites of fragmentation are identified in reference.<sup>50</sup>

**Table S3.** Method performance characteristics for analytes quantified by LC-MS/MS. Results of the spike-recovery experiments are presented as absolute recoveries for urine and plasma.

| Analyte                | Standard Curve<br>( $\mu\text{g/L}$ ) | LOD<br>( $\mu\text{g/L}$ ) | LOQ<br>( $\mu\text{g/L}$ ) | MDL<br>Urine<br>( $\mu\text{g/L}$ ) | MDL<br>Plasma<br>( $\mu\text{g/L}$ ) | Accuracy $\pm$<br>Precision<br>Urine (%)<br>0.5 $\mu\text{g/L}$ Spike | Accuracy $\pm$<br>Precision<br>Plasma (%)<br>0.5 $\mu\text{g/L}$ Spike | Spike-Rec.<br>Urine (%) |                     | Spike-Rec.<br>Plasma (%) |                   |
|------------------------|---------------------------------------|----------------------------|----------------------------|-------------------------------------|--------------------------------------|-----------------------------------------------------------------------|------------------------------------------------------------------------|-------------------------|---------------------|--------------------------|-------------------|
|                        |                                       |                            |                            |                                     |                                      |                                                                       |                                                                        | 0.1<br>$\mu\text{g/L}$  | 0.5 $\mu\text{g/L}$ | 0.5<br>$\mu\text{g/L}$   | 5 $\mu\text{g/L}$ |
|                        |                                       |                            |                            |                                     |                                      |                                                                       |                                                                        | *Triclosan              | 0.025-5.00          | 0.025                    | 0.085             |
| *Triclocarban          | 0.005-5.00                            | 0.006                      | 0.020                      | 0.021                               | 0.173                                | 87 $\pm$ 5                                                            | 109 $\pm$ 5                                                            | 90 $\pm$ 9              | 95 $\pm$ 8          | 96 $\pm$ 12              | 116 $\pm$ 4       |
| 2'-OH-Triclocarban     | 0.025-25                              | 0.004                      | 0.014                      | 0.012                               | 0.108                                | 63 $\pm$ 5                                                            | 103 $\pm$ 8                                                            | 103 $\pm$ 5             | 100 $\pm$ 8         | 69 $\pm$ 7               | 73 $\pm$ 8        |
| 3'-OH-Triclocarban     | 0.005-25                              | 0.009                      | 0.030                      | 0.007                               | 0.121                                | 71 $\pm$ 5                                                            | 107 $\pm$ 6                                                            | 107 $\pm$ 5             | 114 $\pm$ 8         | 66 $\pm$ 7               | 70 $\pm$ 6        |
| 3'-Cl-Triclocarban     | 0.005-25                              | 0.009                      | 0.030                      | 0.007                               | 0.127                                | 81 $\pm$ 7                                                            | 118 $\pm$ 8                                                            | 115 $\pm$ 9             | 119 $\pm$ 10        | 67 $\pm$ 7               | 73 $\pm$ 7        |
| *4-Methylumbelliferone | 0.05-25                               | 0.003                      | 0.010                      | 0.052                               | 0.352                                | 95 $\pm$ 3                                                            | 130 $\pm$ 5                                                            | 68 $\pm$ 16             | 54 $\pm$ 3          | 60 $\pm$ 25              | 132 $\pm$ 4       |

\*Isotope-dilution mass spectrometry available. LOD = Instrument Detection Limit, LOQ = Instrumental Quantification Limit, MDL: Method

Detection Limit, Rec.: Recovery.

**Table S4.** The total ( $\Sigma$ -) concentrations of TCS, TCC, 2'-OH-TCC, 3'-OH-TCC, 3'-Cl-TCC measured in maternal urine and cord blood plasma from 181 mother-child pairs in an urban population.

| Subject | Total ( $\Sigma$ -) Concentrations ( $\mu\text{g/L}$ ) |           |       |           |           |           |                   |       |           |           |           |
|---------|--------------------------------------------------------|-----------|-------|-----------|-----------|-----------|-------------------|-------|-----------|-----------|-----------|
|         | Maternal Urine                                         |           |       |           |           |           | Cord Blood Plasma |       |           |           |           |
|         | Creatinine (g/L)                                       | TCS       | TCC   | 2'-OH-TCC | 3'-OH-TCC | 3'-Cl-TCC | TCS               | TCC   | 2'-OH-TCC | 3'-OH-TCC | 3'-Cl-TCC |
| 00001   | 1.12                                                   | 44.93     | 0.14  | 0.01      | <0.01     | <0.01     | -                 | -     | -         | -         | -         |
| 00002   | 0.86                                                   | 6.00      | 0.06  | <0.01     | <0.01     | <0.01     | -                 | -     | -         | -         | -         |
| 00003   | 1.07                                                   | 8.09      | 0.18  | <0.01     | <0.01     | <0.01     | -                 | -     | -         | -         | -         |
| 00004   | 1.88                                                   | 11.94     | 0.98  | 0.04      | <0.01     | <0.01     | -                 | -     | -         | -         | -         |
| 00005   | 1.25                                                   | 44.13     | 0.69  | 0.05      | 0.01      | <0.01     | -                 | -     | -         | -         | -         |
| 00006   | 0.94                                                   | 180.62    | 0.13  | <0.01     | <0.01     | <0.01     | -                 | -     | -         | -         | -         |
| 00007   | 1.57                                                   | 491.54    | 0.08  | <0.01     | <0.01     | <0.01     | -                 | -     | -         | -         | -         |
| 00008   | 1.54                                                   | 1.57      | 2.72  | 0.35      | 0.09      | 0.01      | 2.15              | <0.17 | <0.11     | <0.12     | <0.13     |
| 00009   | 0.84                                                   | 13.69     | 0.04  | <0.01     | <0.01     | <0.01     | -                 | -     | -         | -         | -         |
| 00010   | 2.19                                                   | 48.98     | 0.90  | 0.08      | 0.01      | <0.01     | -                 | -     | -         | -         | -         |
| 00011   | 0.85                                                   | 0.90      | 0.39  | <0.01     | <0.01     | <0.01     | <0.53             | 0.28  | <0.11     | <0.12     | <0.13     |
| 00012   | 0.14                                                   | 76.06     | 0.09  | <0.01     | <0.01     | <0.01     | -                 | -     | -         | -         | -         |
| 00013   | -                                                      | 1.86      | 0.03  | <0.01     | <0.01     | <0.01     | -                 | -     | -         | -         | -         |
| 00014   | 2.66                                                   | 11,909.30 | 0.35  | <0.01     | <0.01     | <0.01     | -                 | -     | -         | -         | -         |
| 00015   | 0.33                                                   | 0.63      | 0.03  | <0.01     | <0.01     | <0.01     | -                 | -     | -         | -         | -         |
| 00016   | 0.91                                                   | 0.88      | 43.16 | 1.01      | 0.18      | 0.08      | -                 | -     | -         | -         | -         |
| 00017   | 1.82                                                   | 1.11      | 0.07  | <0.01     | <0.01     | <0.01     | -                 | -     | -         | -         | -         |
| 00018   | 0.75                                                   | 255.65    | 0.48  | <0.01     | <0.01     | <0.01     | -                 | -     | -         | -         | -         |
| 00019   | 2.96                                                   | 64.84     | 0.18  | <0.01     | <0.01     | <0.01     | -                 | -     | -         | -         | -         |
| 00020   | 0.73                                                   | 4.67      | 0.48  | <0.01     | <0.01     | <0.01     | -                 | -     | -         | -         | -         |
| 00021   | 0.75                                                   | 2.02      | 0.15  | <0.01     | <0.01     | <0.01     | -                 | -     | -         | -         | -         |
| 00022   | 1.23                                                   | 1.10      | <0.02 | <0.01     | <0.01     | <0.01     | -                 | -     | -         | -         | -         |
| 00023   | 0.29                                                   | 13.91     | 0.12  | <0.01     | <0.01     | <0.01     | -                 | -     | -         | -         | -         |
| 00024   | 2.96                                                   | 1.39      | 0.28  | 0.01      | <0.01     | <0.01     | -                 | -     | -         | -         | -         |
| 00025   | 1.67                                                   | 22.31     | 0.38  | 0.02      | <0.01     | 0.01      | 1.74              | 1.17  | <0.11     | <0.12     | <0.13     |
| 00026   | 1.27                                                   | 18.60     | 77.41 | 3.36      | 0.49      | 0.32      | -                 | -     | -         | -         | -         |
| 00027   | 0.47                                                   | 3.74      | 0.04  | <0.01     | <0.01     | <0.01     | -                 | -     | -         | -         | -         |
| 00028   | 2.93                                                   | 1,107.92  | 0.05  | <0.01     | <0.01     | <0.01     | -                 | -     | -         | -         | -         |
| 00029   | 0.36                                                   | 34.07     | 0.60  | <0.01     | <0.01     | <0.01     | 13.75             | <0.17 | <0.11     | <0.12     | <0.13     |
| 00030   | -                                                      | 37.24     | 0.16  | <0.01     | <0.01     | <0.01     | -                 | -     | -         | -         | -         |
| 00031   | 0.63                                                   | 304.57    | 0.06  | <0.01     | <0.01     | <0.01     | -                 | -     | -         | -         | -         |
| 00032   | 1.20                                                   | 1.21      | 0.06  | <0.01     | <0.01     | <0.01     | 13.62             | <0.17 | <0.11     | <0.12     | <0.13     |

|       |      |          |       |       |       |       |       |       |       |       |       |
|-------|------|----------|-------|-------|-------|-------|-------|-------|-------|-------|-------|
| 00033 | 1.54 | 32.05    | 0.28  | 0.05  | 0.01  | <0.01 | -     | -     | -     | -     | -     |
| 00034 | 2.27 | 14.28    | 0.03  | <0.01 | <0.01 | 0.01  | -     | -     | -     | -     | -     |
| 00035 | 1.23 | 29.08    | 0.32  | <0.01 | <0.01 | <0.01 | -     | -     | -     | -     | -     |
| 00036 | 0.25 | 0.16     | 0.16  | <0.01 | <0.01 | <0.01 | -     | -     | -     | -     | -     |
| 00037 | 1.59 | 9.99     | 1.53  | 0.12  | 0.02  | 0.01  | -     | -     | -     | -     | -     |
| 00038 | 1.23 | 17.63    | 7.59  | 1.68  | 0.15  | 0.06  | -     | -     | -     | -     | -     |
| 00039 | 1.13 | 7.56     | 1.20  | 0.12  | 0.04  | 0.01  | -     | -     | -     | -     | -     |
| 00040 | 1.67 | 277.75   | 17.74 | 0.31  | 0.07  | 0.06  | -     | -     | -     | -     | -     |
| 00041 | 1.46 | 56.75    | <0.02 | 0.02  | <0.01 | 0.04  | -     | -     | -     | -     | -     |
| 00042 | 2.40 | 9.16     | <0.02 | <0.01 | <0.01 | <0.01 | -     | -     | -     | -     | -     |
| 00043 | 0.82 | 27.20    | 16.52 | 0.56  | 0.07  | 0.03  | -     | -     | -     | -     | -     |
| 00044 | 2.42 | 76.82    | 0.37  | 0.04  | <0.01 | <0.01 | -     | -     | -     | -     | -     |
| 00045 | 1.57 | 3.67     | <0.02 | 0.01  | <0.01 | <0.01 | -     | -     | -     | -     | -     |
| 00046 | 0.82 | 598.44   | <0.02 | <0.01 | <0.01 | <0.01 | -     | -     | -     | -     | -     |
| 00047 | 3.73 | 2,277.10 | 16.83 | 2.31  | 0.24  | 0.08  | -     | -     | -     | -     | -     |
| 00048 | 1.60 | 71.09    | <0.02 | <0.01 | <0.01 | <0.01 | -     | -     | -     | -     | -     |
| 00049 | 1.45 | 12.27    | <0.02 | <0.01 | <0.01 | <0.01 | -     | -     | -     | -     | -     |
| 00050 | 1.89 | 3.77     | <0.02 | <0.01 | <0.01 | <0.01 | -     | -     | -     | -     | -     |
| 00051 | 2.17 | 2.71     | 1.72  | 0.09  | 0.02  | 0.02  | -     | -     | -     | -     | -     |
| 00052 | -    | 1.82     | <0.02 | <0.01 | <0.01 | <0.01 | -     | -     | -     | -     | -     |
| 00053 | 1.32 | 19.53    | <0.02 | <0.01 | <0.01 | <0.01 | -     | -     | -     | -     | -     |
| 00054 | 1.18 | 12.25    | 0.21  | <0.01 | <0.01 | <0.01 | -     | -     | -     | -     | -     |
| 00055 | 1.89 | 5.71     | <0.02 | <0.01 | <0.01 | <0.01 | -     | -     | -     | -     | -     |
| 00056 | 1.05 | 59.83    | 1.05  | 0.09  | 0.03  | 0.01  | -     | -     | -     | -     | -     |
| 00057 | 1.78 | 2.02     | <0.02 | <0.01 | <0.01 | <0.01 | -     | -     | -     | -     | -     |
| 00058 | 2.09 | 138.09   | <0.02 | 0.11  | 0.02  | <0.01 | -     | -     | -     | -     | -     |
| 00059 | 1.94 | 756.90   | 1.10  | 0.08  | 0.02  | 0.01  | 3.81  | 0.25  | <0.11 | <0.12 | <0.13 |
| 00060 | -    | 72.44    | <0.02 | <0.01 | <0.01 | <0.01 | -     | -     | -     | -     | -     |
| 00061 | 1.09 | 0.55     | 0.99  | <0.01 | <0.01 | <0.01 | -     | -     | -     | -     | -     |
| 00062 | 0.82 | 2.03     | 1.56  | <0.01 | <0.01 | <0.01 | -     | -     | -     | -     | -     |
| 00063 | 2.05 | 50.68    | 28.15 | 3.83  | 0.46  | 0.15  | -     | -     | -     | -     | -     |
| 00064 | 0.92 | 9.40     | 0.40  | <0.01 | <0.01 | <0.01 | -     | -     | -     | -     | -     |
| 00065 | 1.43 | 2.57     | 9.65  | 0.37  | 0.05  | <0.01 | -     | -     | -     | -     | -     |
| 00066 | 1.68 | 3.61     | 0.09  | <0.01 | <0.01 | <0.01 | -     | -     | -     | -     | -     |
| 00067 | 0.99 | 0.22     | 0.08  | <0.01 | <0.01 | <0.01 | -     | -     | -     | -     | -     |
| 00068 | 2.08 | 10.59    | 6.83  | 0.37  | 0.04  | <0.01 | -     | -     | -     | -     | -     |
| 00069 | 2.30 | 17.15    | 0.07  | <0.01 | <0.01 | <0.01 | 13.88 | <0.17 | <0.11 | <0.12 | <0.13 |
| 00070 | 1.31 | 287.47   | 0.07  | <0.01 | <0.01 | <0.01 | 47.55 | <0.17 | <0.11 | <0.12 | <0.13 |
| 00071 | -    | 70.10    | 0.33  | <0.01 | <0.01 | <0.01 | -     | -     | -     | -     | -     |
| 00072 | 2.18 | 11.85    | 0.15  | <0.01 | <0.01 | <0.01 | -     | -     | -     | -     | -     |

|        |      |        |        |       |       |       |        |       |       |       |       |
|--------|------|--------|--------|-------|-------|-------|--------|-------|-------|-------|-------|
| 00073  | 2.54 | 6.36   | 4.71   | 0.02  | <0.01 | <0.01 | -      | -     | -     | -     | -     |
| 00074  | 1.33 | 1.43   | 0.07   | <0.01 | <0.01 | <0.01 | -      | -     | -     | -     | -     |
| 00075  | 1.58 | 10.89  | 0.70   | <0.01 | <0.01 | <0.01 | -      | -     | -     | -     | -     |
| 00076  | 1.65 | 12.70  | 0.31   | <0.01 | <0.01 | <0.01 | -      | -     | -     | -     | -     |
| 00077  | 0.36 | 2.15   | <0.02  | <0.01 | <0.01 | <0.01 | -      | -     | -     | -     | -     |
| 00078  | 1.78 | 5.32   | 0.29   | <0.01 | <0.01 | <0.01 | -      | -     | -     | -     | -     |
| 00079  | 0.38 | 83.13  | 0.02   | <0.01 | <0.01 | <0.01 | -      | -     | -     | -     | -     |
| 00080  | 2.71 | 1.97   | 0.07   | <0.01 | <0.01 | <0.01 | <0.53  | <0.17 | <0.11 | <0.12 | <0.13 |
| 00081  | 1.79 | 8.76   | <0.02  | <0.01 | <0.01 | <0.01 | -      | -     | -     | -     | -     |
| 00082  | 2.35 | 18.69  | 34.65  | 35.01 | 4.88  | 0.93  | -      | -     | -     | -     | -     |
| 00083  | 0.66 | 5.84   | 17.24  | 0.54  | 0.09  | 0.05  | -      | -     | -     | -     | -     |
| 00084  | 1.58 | 13.56  | 5.66   | 0.82  | 0.02  | <0.01 | -      | -     | -     | -     | -     |
| 00085  | 1.62 | 13.54  | 0.12   | <0.01 | <0.01 | <0.01 | -      | -     | -     | -     | -     |
| 00086a | 2.75 | 9.88   | 0.10   | <0.01 | <0.01 | <0.01 | 0.54   | 0.45  | <0.11 | <0.12 | <0.13 |
| 00086b | -    | -      | -      | -     | -     | -     | <0.53  | 0.93  | <0.11 | <0.12 | <0.13 |
| 00087  | 1.40 | 2.81   | 0.16   | <0.01 | <0.01 | <0.01 | -      | -     | -     | -     | -     |
| 00088  | 2.23 | 14.14  | 0.99   | 0.03  | <0.01 | <0.01 | -      | -     | -     | -     | -     |
| 00089  | -    | 7.37   | 0.48   | <0.01 | <0.01 | <0.01 | -      | -     | -     | -     | -     |
| 00090  | 1.94 | 1.73   | 3.65   | <0.01 | <0.01 | <0.01 | -      | -     | -     | -     | -     |
| 00091  | 1.50 | 45.50  | 101.70 | 19.31 | 2.61  | 1.53  | -      | -     | -     | -     | -     |
| 00092  | 2.71 | 4.32   | 0.15   | <0.01 | <0.01 | <0.01 | -      | -     | -     | -     | -     |
| 00093  | 0.43 | 0.59   | 3.33   | 0.19  | 0.04  | <0.01 | <0.53  | <0.17 | <0.11 | <0.12 | <0.13 |
| 00094  | -    | 1.17   | 5.47   | 0.01  | <0.01 | <0.01 | -      | -     | -     | -     | -     |
| 00095  | 1.09 | 38.88  | 2.72   | 0.13  | <0.01 | <0.01 | -      | -     | -     | -     | -     |
| 00096  | 1.81 | 2.75   | 30.40  | 1.73  | 0.26  | 0.10  | -      | -     | -     | -     | -     |
| 00097  | 0.86 | 6.21   | 0.21   | <0.01 | <0.01 | <0.01 | -      | -     | -     | -     | -     |
| 00098  | 2.79 | 5.39   | 47.68  | 0.82  | <0.01 | 0.01  | -      | -     | -     | -     | -     |
| 00099  | 2.19 | 321.90 | 0.04   | <0.01 | <0.01 | <0.01 | -      | -     | -     | -     | -     |
| 00100  | 1.85 | 691.72 | 0.34   | <0.01 | <0.01 | <0.01 | -      | -     | -     | -     | -     |
| 00101  | -    | 9.06   | <0.02  | <0.01 | <0.01 | <0.01 | -      | -     | -     | -     | -     |
| 00102  | 2.14 | 3.99   | 0.36   | <0.01 | <0.01 | <0.01 | -      | -     | -     | -     | -     |
| 00103  | 3.13 | 4.15   | 1.19   | <0.01 | <0.01 | <0.01 | <0.53  | 0.16  | <0.11 | <0.12 | <0.13 |
| 00104  | 1.74 | 626.42 | 0.13   | <0.01 | <0.01 | <0.01 | -      | -     | -     | -     | -     |
| 00105  | 1.73 | 5.24   | <0.02  | <0.01 | <0.01 | <0.01 | -      | -     | -     | -     | -     |
| 00106  | 0.82 | 146.88 | 0.11   | <0.01 | <0.01 | <0.01 | 127.60 | <0.17 | <0.11 | <0.12 | <0.13 |
| 00107  | 1.38 | 7.95   | 16.00  | 0.45  | 0.01  | <0.01 | -      | -     | -     | -     | -     |
| 00108  | 0.95 | 36.71  | 0.04   | <0.01 | <0.01 | <0.01 | -      | -     | -     | -     | -     |
| 00109  | 2.19 | 610.21 | 0.72   | <0.01 | <0.01 | <0.01 | 22.61  | <0.17 | <0.11 | <0.12 | <0.13 |
| 00110  | 0.43 | 2.01   | 0.06   | <0.01 | <0.01 | <0.01 | -      | -     | -     | -     | -     |
| 00111  | 1.33 | 26.19  | 0.39   | <0.01 | <0.01 | <0.01 | -      | -     | -     | -     | -     |

|       |      |          |       |       |       |       |       |       |       |       |       |
|-------|------|----------|-------|-------|-------|-------|-------|-------|-------|-------|-------|
| 00112 | 1.75 | 5.14     | 14.36 | 0.10  | <0.01 | <0.01 | <0.53 | <0.17 | <0.11 | <0.12 | <0.13 |
| 00113 | 1.69 | 0.96     | 0.40  | <0.01 | <0.01 | <0.01 | -     | -     | -     | -     | -     |
| 00114 | 1.58 | 34.60    | 0.70  | 0.01  | <0.01 | <0.01 | -     | -     | -     | -     | -     |
| 00115 | 1.68 | 0.94     | 0.99  | <0.01 | <0.01 | <0.01 | -     | -     | <0.11 | <0.12 | <0.13 |
| 00116 | 0.79 | 170.37   | 0.09  | <0.01 | <0.01 | <0.01 | <0.53 | <0.17 | <0.11 | <0.12 | <0.13 |
| 00117 | 0.84 | 22.06    | 0.15  | <0.01 | <0.01 | <0.01 | -     | -     | -     | -     | -     |
| 00118 | 0.65 | 0.82     | <0.02 | <0.01 | <0.01 | <0.01 | -     | -     | -     | -     | -     |
| 00119 | 1.44 | 28.02    | 0.13  | <0.01 | <0.01 | <0.01 | -     | -     | -     | -     | -     |
| 00120 | 0.90 | 39.08    | 0.06  | <0.01 | <0.01 | <0.01 | -     | -     | -     | -     | -     |
| 00121 | 3.79 | 6.03     | 0.07  | <0.01 | <0.01 | <0.01 | -     | -     | -     | -     | -     |
| 00122 | 1.83 | 850.04   | 0.41  | <0.01 | <0.01 | <0.01 | -     | -     | -     | -     | -     |
| 00123 | 1.68 | 226.60   | 9.10  | 0.24  | <0.01 | <0.01 | -     | -     | -     | -     | -     |
| 00124 | 0.86 | 16.86    | 0.30  | <0.01 | <0.01 | <0.01 | -     | -     | -     | -     | -     |
| 00125 | 1.14 | 10.66    | 0.45  | <0.01 | <0.01 | <0.01 | -     | -     | -     | -     | -     |
| 00126 | 1.57 | 0.49     | 42.38 | 6.88  | 1.12  | 0.36  | <0.53 | 1.08  | <0.11 | <0.12 | <0.13 |
| 00127 | -    | 1.21     | 0.16  | <0.01 | <0.01 | <0.01 | -     | -     | -     | -     | -     |
| 00128 | 0.69 | 250.82   | 0.11  | <0.01 | <0.01 | <0.01 | -     | -     | -     | -     | -     |
| 00129 | -    | 7.67     | 0.16  | <0.01 | <0.01 | <0.01 | <0.53 | <0.17 | <0.11 | <0.12 | <0.13 |
| 00130 | 0.74 | 171.18   | 0.08  | <0.01 | <0.01 | <0.01 | -     | -     | -     | -     | -     |
| 00131 | 1.70 | 1,156.00 | 0.32  | <0.01 | <0.01 | <0.01 | -     | -     | -     | -     | -     |
| 00132 | 1.39 | 1.66     | 4.16  | 0.12  | <0.01 | <0.01 | -     | -     | -     | -     | -     |
| 00133 | 2.54 | 10.26    | 3.89  | 0.09  | <0.01 | <0.01 | -     | -     | -     | -     | -     |
| 00134 | 2.93 | 2,271.11 | 0.61  | 0.31  | 0.06  | <0.01 | <0.53 | <0.17 | <0.11 | <0.12 | <0.13 |
| 00135 | 3.08 | 3.48     | 0.27  | <0.01 | <0.01 | <0.01 | -     | -     | -     | -     | -     |
| 00136 | 2.85 | 7.24     | 0.65  | <0.01 | <0.01 | <0.01 | -     | -     | -     | -     | -     |
| 00137 | 1.66 | 1.77     | <0.02 | <0.01 | <0.01 | <0.01 | <0.53 | <0.17 | <0.11 | <0.12 | <0.13 |
| 00138 | 2.73 | 174.98   | 0.05  | <0.01 | <0.01 | <0.01 | -     | -     | -     | -     | -     |
| 00139 | 2.34 | 2.80     | 0.47  | <0.01 | <0.01 | <0.01 | -     | -     | -     | -     | -     |
| 00140 | 1.03 | 0.75     | <0.02 | <0.01 | <0.01 | <0.01 | -     | -     | -     | -     | -     |
| 00141 | 1.98 | 50.62    | 0.03  | <0.01 | 4.00  | <0.01 | -     | -     | -     | -     | -     |
| 00142 | 1.97 | 2.35     | 0.09  | <0.01 | <0.01 | <0.01 | -     | -     | -     | -     | -     |
| 00143 | 0.63 | 1.07     | 0.07  | <0.01 | <0.01 | <0.01 | <0.53 | <0.17 | <0.11 | <0.12 | <0.13 |
| 00144 | 2.98 | 53.20    | 0.53  | <0.01 | <0.01 | <0.01 | -     | -     | -     | -     | -     |
| 00145 | 2.77 | 36.82    | 0.07  | <0.01 | <0.01 | <0.01 | 1.89  | <0.17 | <0.11 | <0.12 | <0.13 |
| 00146 | 1.08 | 9.32     | 0.04  | <0.01 | <0.01 | <0.01 | -     | -     | -     | -     | -     |
| 00147 | -    | 2.34     | 0.09  | <0.01 | <0.01 | <0.01 | -     | -     | -     | -     | -     |
| 00148 | 0.22 | 2.15     | 0.03  | <0.01 | <0.01 | <0.01 | -     | -     | -     | -     | -     |
| 00149 | 0.88 | 11.66    | 0.09  | <0.01 | <0.01 | <0.01 | -     | -     | -     | -     | -     |
| 00150 | 1.39 | 2.00     | 2.26  | <0.01 | <0.01 | <0.01 | -     | -     | -     | -     | -     |
| 00151 | 1.93 | 7.39     | 0.58  | <0.01 | <0.01 | <0.01 | -     | -     | -     | -     | -     |



|        |      |        |        |       |       |       |       |       |       |       |       |
|--------|------|--------|--------|-------|-------|-------|-------|-------|-------|-------|-------|
| 00152  | 3.28 | 41.66  | 0.19   | <0.01 | <0.01 | <0.01 | -     | -     | -     | -     | -     |
| 00153  | 1.77 | 1.57   | 0.09   | <0.01 | <0.01 | <0.01 | -     | -     | -     | -     | -     |
| 00154  | 0.89 | 2.90   | 0.64   | <0.01 | <0.01 | <0.01 | -     | -     | -     | -     | -     |
| 00155  | 3.38 | 1.71   | 0.35   | <0.01 | <0.01 | <0.01 | -     | -     | -     | -     | -     |
| 00156a | 2.32 | 26.90  | 107.00 | 4.73  | 0.80  | 0.90  | <0.53 | 0.43  | <0.11 | <0.12 | <0.13 |
| 00156b | -    | -      | -      | -     | -     | -     | 4.35  | 0.26  | <0.11 | <0.12 | <0.13 |
| 00157  | 0.65 | 455.27 | 0.09   | <0.01 | <0.01 | <0.01 | -     | -     | -     | -     | -     |
| 00158  | 2.21 | 3.27   | 1.29   | <0.01 | <0.01 | <0.01 | -     | -     | -     | -     | -     |
| 00159  | 2.05 | 14.30  | 0.18   | <0.01 | <0.01 | <0.01 | -     | -     | -     | -     | -     |
| 00160  | 0.37 | 3.59   | 0.15   | <0.01 | <0.01 | <0.01 | <0.53 | <0.17 | <0.11 | <0.12 | <0.13 |
| 00161  | 0.84 | 3.16   | 0.47   | <0.01 | <0.01 | <0.01 | -     | -     | -     | -     | -     |
| 00162  | 2.58 | 29.43  | 0.09   | <0.01 | <0.01 | <0.01 | -     | -     | -     | -     | -     |
| 00163  | 0.82 | 116.28 | <0.02  | <0.01 | <0.01 | <0.01 | -     | -     | -     | -     | -     |
| 00164  | 0.80 | 4.66   | 0.05   | <0.01 | <0.01 | <0.01 | <0.53 | <0.17 | <0.11 | <0.12 | <0.13 |
| 00165  | 0.20 | 3.06   | <0.02  | <0.01 | <0.01 | <0.01 | 0.34  | <0.17 | <0.11 | <0.12 | <0.13 |
| 00166  | 0.74 | 24.36  | 2.34   | 0.01  | <0.01 | <0.01 | -     | -     | -     | -     | -     |
| 00167  | 2.51 | 31.60  | 0.28   | <0.01 | <0.01 | <0.01 | -     | -     | -     | -     | -     |
| 00168  | 3.51 | 509.28 | 0.51   | <0.01 | <0.01 | <0.01 | -     | -     | -     | -     | -     |
| 00169  | 1.38 | 3.69   | 0.05   | <0.01 | <0.01 | <0.01 | 1.89  | <0.17 | <0.11 | <0.12 | <0.13 |
| 00170  | 2.67 | 5.08   | 0.44   | <0.01 | <0.01 | <0.01 | 12.54 | <0.17 | <0.11 | <0.12 | <0.13 |
| 00171  | 1.88 | 5.84   | 1.48   | 0.03  | <0.01 | <0.01 | -     | -     | -     | -     | -     |
| 00172  | 0.64 | 1.17   | 0.05   | <0.01 | <0.01 | <0.01 | 0.79  | <0.17 | <0.11 | <0.12 | <0.13 |
| 00173  | 2.55 | 7.90   | 0.58   | <0.01 | <0.01 | <0.01 | <0.53 | <0.17 | <0.11 | <0.12 | <0.13 |
| 00174  | -    | 1.48   | 0.31   | <0.01 | <0.01 | <0.01 | -     | -     | -     | -     | -     |
| 00175  | -    | 2.16   | 1.87   | <0.01 | <0.01 | <0.01 | -     | -     | -     | -     | -     |
| 00176  | -    | 2.25   | 0.21   | <0.01 | <0.01 | <0.01 | -     | -     | -     | -     | -     |
| 00177  | 1.24 | 3.57   | <0.02  | <0.01 | <0.01 | <0.01 | <0.53 | <0.17 | <0.11 | <0.12 | <0.13 |
| 00178  | 1.40 | 6.09   | 0.02   | <0.01 | <0.01 | <0.01 | <0.53 | <0.17 | <0.11 | <0.12 | <0.13 |
| 00179  | 1.13 | 1.48   | 0.48   | <0.01 | <0.01 | <0.01 | -     | -     | -     | -     | -     |
| 00180  | 1.15 | 4.55   | 2.47   | 0.08  | <0.01 | <0.01 | -     | -     | -     | -     | -     |
| 00181  | 1.01 | 3.88   | 0.02   | <0.01 | <0.01 | <0.01 | 6.63  | <0.17 | <0.11 | <0.12 | <0.13 |

- : Not determined.
